# Supplementary material
Source: PubMed Central journal article supplement (PMC3761610)
Supplement: 1303204110_pnas.201303204SI.pdf [file 1303204110_pnas.201303204SI.pdf]

# Supporting Information

Hanker et al. 10.1073/pnas.1303204110

## SI Materials and Methods

**Transgenic Mice.** All transgenic mice were maintained on a high-fat diet (5LJ5; LabDiet). Mice were administered 2 mg/mL doxycycline (DOX) in 5% sucrose water as published previously (1) or 5% sucrose water alone (vehicle control) beginning at 4 wk of age. Fresh DOX water was replaced twice weekly. Tumor formation was monitored twice weekly by palpation. Tumor volume in cubic millimeters was calculated by the formula: volume = width<sup>2</sup> × length/2. Tumor-free survival was analyzed using the Kaplan–Meier method. Mice were killed when total tumor volume reached 1,500–2,000 mm<sup>3</sup> or when animals showed signs of distress or tumor hemorrhage. All genotypes were confirmed by PCR of mouse tail DNA at time of killing.

**In Vivo Bioluminescent Imaging.** Luciferase gene expression in live mice was monitored using the Xenogen IVIS 200 imaging system. Mice were anesthetized with isoflurane and administered 2 mg VivoGlo Luciferin (Promega) dissolved in PBS and administered i.p. 15–20 min before imaging. Images were captured using Living Image 4.0 software. Imaging was performed at the Center for Small Animal Imaging, Vanderbilt University Institute of Imaging Science.

**Histological Analysis, Immunohistochemistry, and Immunofluorescence.** Whole mammary glands (no. 4 inguinal) were fixed in 10% neutral-buffered formalin (NBF), mounted on glass slides, and stained with hematoxylin, as described previously (2). Mammary glands, tumors, and lungs were fixed in 10% NBF and embedded in paraffin. Sections (5 μm) were stained with hematoxylin and eosin (H&E), or used for immunohistochemistry (IHC) of Cytokeratin 14 (Thermo Scientific; RB-9020; 1:1,000), Cytokeratin 18 (Abcam; ab32118; 1:100), Snail/Slug (Abcam; ab85936), p63 (Sigma; P3737; 1:800), Vimentin (Epitomics; 2707–1), Ki67 (Zymed Invitrogen), phospho-AKT<sup>S473</sup> (Cell Signaling Technologies; 4060; 1:10), or terminal deoxynucleotidyl transferase-mediated dUTP nick end labeling (TUNEL) analysis (ApopTag In Situ Apoptosis Detection kit; EMD Millipore). An expert breast pathologist (M. G.K.) blinded to the mouse genotypes/treatments scored the sections and diagnosed the histopathology of each tumor. The intensity of cytoplasmic p-AKT staining was graded using a score of 0–300 as described (3). Images were obtained using Olympus DP2 software on an Olympus light microscope.

For tissue immunofluorescence (IF), following antigen retrieval with pepsin, 5-μm sections were stained with either trastuzumab (21 μg/mL) followed by Alexa Fluor 488 anti-human IgG (Invitrogen; 1:100) or HA (Cell Signaling; 3724; 1:25) followed by Alexa Fluor 594 anti-rabbit IgG (Invitrogen; 1:500). Images were captured from an upright microscope (Axioplan 2; Carl Zeiss) using MetaMorph software (MDS Analytical Technologies). Colocalization analysis of IF signals was performed using MetaMorph software. Briefly, background (median filter of 32 × 32 pixels) was subtracted from the original image and a threshold of 116 was set for both channels. Percent overlap for each channel (green and red) was calculated using the Measure Colocalization application.

**Western Blot Analysis.** Snap-frozen mammary glands or tumors were homogenized and lysed in buffer containing 50 mM Tris-HCl pH 8.0, 150 mM NaCl, 2 mM EDTA pH 8.0, 10 mM NaF, 20% glycerol, 1% Nonidet P-40, plus protease and phosphatase inhibitors. Lysates were cleared by centrifugation at >20,000 × g for 10 min. Protein concentration was determined using the bicinchoninic acid (BCA) assay (Pierce). Lysates were resolved

on SDS/PAGE gels and transferred to nitrocellulose membranes. The following antibodies were used: phospho-human epidermal growth factor receptor 2 (HER2) Y1248 (1:500), phospho-HER3 Y1289 (1:1,000), HA (1:1,000), phospho-AKT T308 (1:500), phospho-AKT S473 (1:500), AKT (1:1,000), phospho-PRAS40 T246 (1:1,000), PRAS40 (1:1,000), phospho-S6 S240/S244 (1:1,000), S6 (1:1,000), phospho-ERK1/2 T202/Y204 (1:1,000), ERK1/2 (1:1,000), E-cadherin (1:1,000), N-cadherin (1:500), and Vimentin (1:1,000) (all Cell Signaling), HER2 (Neomarkers; 1:1,000), HER3 (Santa Cruz; 1:1,000), and β-actin (Sigma; 1:5,000).

**Microarray Analysis.** RNA was harvested from six *HER2* tumors (3 *HER2* + DOX and 3 *HER2* – DOX), six *phosphatidylinositol-4,5-bisphosphate 3-kinase, catalytic subunit alpha (PIK3CA)* tumors, and seven *HER2*<sup>+</sup>*PIK3CA* tumors using the RNeasy Mini kit (Qiagen) according to the manufacturer's instructions. Appropriate *HER2* and HA-PI3K expression was confirmed in all tumors by immunofluorescence and Western blot analysis. Total RNA was hybridized to custom Agilent 4 × 180 K mouse microarrays as previously described (4). The microarray data were uploaded to the University of North Carolina Microarray Database (UMD; <https://genome.unc.edu/pubsup/breastGEO/clinicalData.shtml>) and to the Gene Expression Omnibus (GEO) under accession no. GSE41118. Microarray samples were combined into a single dataset with other murine models of mammary carcinoma [GSE3165 (4) and GSE27101 (5)] using normalization methods as previously described (6). Gene expression signatures were derived using an unpaired, two-class (“tumors of interest” versus “all other tumors”) significance analysis of microarray (SAM) analysis (7), with genes having a false discovery rate (FDR) of 0% being considered statistically different. The gene expression signature value for each tumor sample was determined by subtracting the average of down-regulated genes from the average of up-regulated genes. Tumor differentiation scores were calculated as previously described (8).

For clustering analysis, the data were first filtered for only those probesets that matched to a unique Entrez gene identification and with a coefficient of variation greater than 50% across all samples (6,804 unique genes). The data were then analyzed by ANOVA using a three-class comparison. Multiple comparisons were corrected for by adjusting the *P* values using the Benjamini and Hochberg method (9). An FDR cutoff of 0.05 resulted in a dataset of 81 significantly altered genes. These data were then used for hierarchical clustering in R.

**Gene Set Analysis.** Gene set analysis (GSA), a variation on Gene Set Enrichment Analysis (GSEA) (10), was performed in R ([www.r-project.org](http://www.r-project.org)) using the package GSA. First, the mouse gene arrays were mapped to the human orthologs. Three classes (*PIK3CA*, *HER2*, and *HER2*<sup>+</sup>*PIK3CA*) were analyzed by GSA using the “multiclass” algorithm and the “maxmean” option. Gene sets from the C2 curated Molecular Signatures Database (10) version 3.0, with a minimum size of five genes, were considered for GSA. Enriched gene sets were chosen at a FDR of 0.2.

**Tumor Dissociation and Mammosphere Assay.** Mammary tumors were harvested, minced, and homogenized in DMEM/F12 medium containing 5% FBS using gentleMACS C tubes (Miltenyi Biotec). Collagenase/hyaluronidase (1×; Stem Cell Technologies) and 40 μg/mL DNaseI (Stem Cell Technologies) were added; homogenized tumors were incubated at 37 °C for 0.5–2 h. Dissociated tumor cells were then passed through 70- and 35-μm

filters. An equal volume of Ficoll-Paque PLUS (GE Healthcare) was added and dissociated tumors were centrifuged at high speed with breaks turned off. Cells found at the gradient were isolated and counted in Trypan blue solution. For the mammosphere assay,  $10^4$  viable cells were plated per well of six-well ultra-low attachment plates (Costar) in triplicate and maintained in serum-free DMEM/F12 containing  $1 \times B27$ , 20 ng/mL EGF, 20 ng/mL bFGF, 4  $\mu$ g/mL heparin  $\pm$  1  $\mu$ g/mL DOX. Where indicated, trastuzumab (20  $\mu$ g/mL) or BKM120 (1  $\mu$ M) were added the day after plating. Media containing fresh drug and DOX was replenished every 3 d and mammospheres were quantified after 12–13 d using the GelCount mammalian cell colony counter (Oxford Optronix). For bioluminescent imaging, 150 ng/mL luciferin was added to the media and plates were imaged using the Xenogen IVIS 200 imaging system.

**Tail Vein Injection Metastasis Assay.** Mammary tumors were homogenized, dissociated, and filtered as above. Tumor epithelial cells were isolated using the EasySep Mouse Epithelial Cell Enrichment kit (Stem Cell Technologies) according to the manufacturer's instructions and resuspended in serum-free DMEM. A total of  $10^5$  cells in 100  $\mu$ L media were injected into the tail vein of 7- to 8-wk-old nude mice using a 27-gauge needle. Nude mice were maintained on 2 mg/mL DOX drinking water. After 32 d, lungs were harvested, fixed in 10% NBF, and embedded in

paraffin. Serial sections (5  $\mu$ m each) were taken every 50  $\mu$ m and stained with H&E. The number of lung metastases was scored for each H&E section. The polygon tool in LP2 software was used to measure the area of each lung metastasis on the fifth H&E section for each mouse.

**Tumor Transplants and Drug Treatments.** *HER2* or *HER2<sup>+</sup>PIK3CA* mammary tumors were harvested, homogenized as above in DMEM + antibiotics/antimycotics, and mixed 1:1 with growth factor-reduced Matrigel (BD Biosciences); 200–300  $\mu$ L of homogenized tumor/Matrigel was injected into the inguinal mammary fat pads of 5- to 7-wk-old athymic female nude mice (Harlan) using a 25-gauge needle. Mice were maintained on 2 mg/mL DOX drinking water. Trastuzumab (30 mg/kg in sterile PBS; Vanderbilt University Pharmacy) and pertuzumab (30 mg/kg in sterile PBS; Vanderbilt University Pharmacy) were administered i.p. twice weekly. BKM120 (30 mg/kg; Novartis) and lapatinib (100 mg/kg; LC Laboratories) were administered daily by oral gavage in 0.5% hydroxypropylmethylcellulose, 0.1% Tween-80. Tumors were measured with calipers two times per week and tumor volume in cubic millimeters was calculated using the formula volume = width<sup>2</sup>  $\times$  length/2. Mice were killed and tumors were harvested after 2–4 wk of treatment, 1 h after the last dose of BKM120 or lapatinib and 24 h after receiving trastuzumab or pertuzumab.

1. Gunther EJ, et al. (2002) A novel doxycycline-inducible system for the transgenic analysis of mammary gland biology. *FASEB J* 16(3):283–292.
2. Muraoka RS, et al. (2002) ErbB2/Neu-induced, cyclin D1-dependent transformation is accelerated in p27-haploinsufficient mammary epithelial cells but impaired in p27-null cells. *Mol Cell Biol* 22(7):2204–2219.
3. Garrett JT, et al. (2011) Transcriptional and posttranslational up-regulation of HER3 (ErbB3) compensates for inhibition of the HER2 tyrosine kinase. *Proc Natl Acad Sci USA* 108(12):5021–5026.
4. Herschkowitz JI, et al. (2007) Identification of conserved gene expression features between murine mammary carcinoma models and human breast tumors. *Genome Biol* 8(5):R76.
5. Herschkowitz JI, et al. (2012) Comparative oncogenomics identifies breast tumors enriched in functional tumor-initiating cells. *Proc Natl Acad Sci USA* 109(8):2778–2783.
6. Roberts PJ, et al. (2012) Combined PI3K/mTOR and MEK inhibition provides broad antitumor activity in faithful murine cancer models. *Clin Cancer Res* 18(19):5290–5303.
7. Tusher VG, Tibshirani R, Chu G (2001) Significance analysis of microarrays applied to the ionizing radiation response. *Proc Natl Acad Sci USA* 98(9):5116–5121.
8. Prat A, et al. (2010) Phenotypic and molecular characterization of the claudin-low intrinsic subtype of breast cancer. *Breast Cancer Res* 12(5):R68.
9. Benjamini Y, Hochberg Y (1995) Controlling the false discovery rate: A practical and powerful approach to multiple testing. *J R Stat Soc, B* 57(1):289–300.
10. Subramanian A, et al. (2005) Gene set enrichment analysis: a knowledge-based approach for interpreting genome-wide expression profiles. *Proc Natl Acad Sci USA* 102(43):15545–15550.

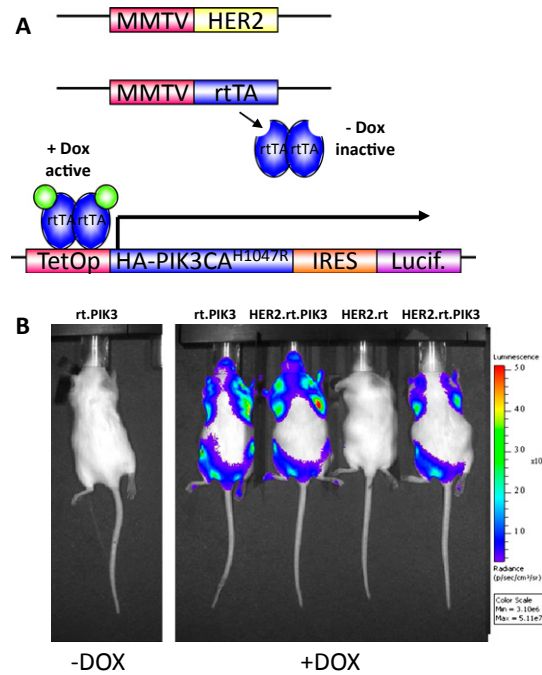

**Fig. S1.** DOX induction of luciferase expression in mammary glands and tumors. (A) The *MMTV-HER2* transgene allows mammary-specific expression of human HER2. In the *MMTV-rtTA* transgene, the reverse tetracycline-dependent transactivator (rtTA) is under the control of the MMTV promoter. In the presence of DOX, rtTA binds to the tet operator (TetOp) and induces transcription of the third transgene, containing *PIK3CA*<sup>H1047R</sup>, an internal ribosomal entry site (IRES) and the firefly luciferase gene. In the absence of DOX, rtTA is inactive, and mutant PI3K and luciferase are not expressed. Mice were bred to express all three transgenes (*HER2*<sup>+</sup>*PIK3CA* mice). (B) Female mice were administered 2 mg/mL DOX or vehicle in their drinking water beginning at 4 wk of age. Following 1 wk of DOX, mice were injected with 2 mg luciferin i.p. and bioluminescence was imaged using the Xenogen IVIS 200 Imaging system.

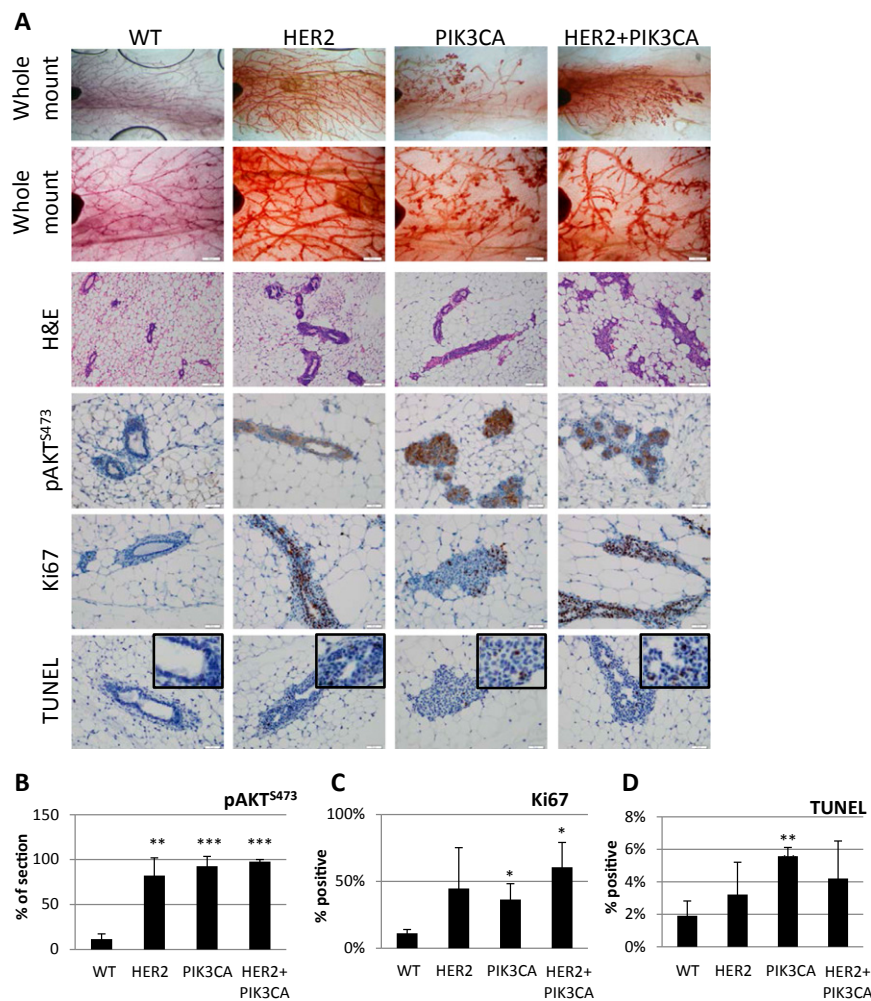

**Fig. S2.** Human HER2 and PI3K<sup>H1047R</sup> dysregulate proliferation and mammary gland morphogenesis. (A) No. 4 inguinal mammary glands were harvested from 12-wk-old mice (8 wk  $\pm$  DOX) of the indicated genotypes. Mice were administered DOX beginning at 4 wk of age. Whole mammary glands were fixed in 10% NBF, mounted on glass slides, and stained with hematoxylin or paraffin-embedded and stained with H&E, pAKT<sup>S473</sup>, and Ki67 or subjected to TUNEL analysis. [Scale bars, second row (from top), 500  $\mu$ m; third row, 100  $\mu$ m; fourth–sixth rows, 50  $\mu$ m.] (B–D) Quantification of the staining in A. Error bars represent the average  $\pm$  SD of three samples per group. (B) The percent of the section that stained positive for pAKT was scored. Percentage of Ki67 (C) and TUNEL (D) positive cells was scored by counting 300–400 cells in each section. \* $P$  < 0.05, \*\* $P$  < 0.01, \*\*\* $P$  < 0.001, relative to WT; Student  $t$  test.

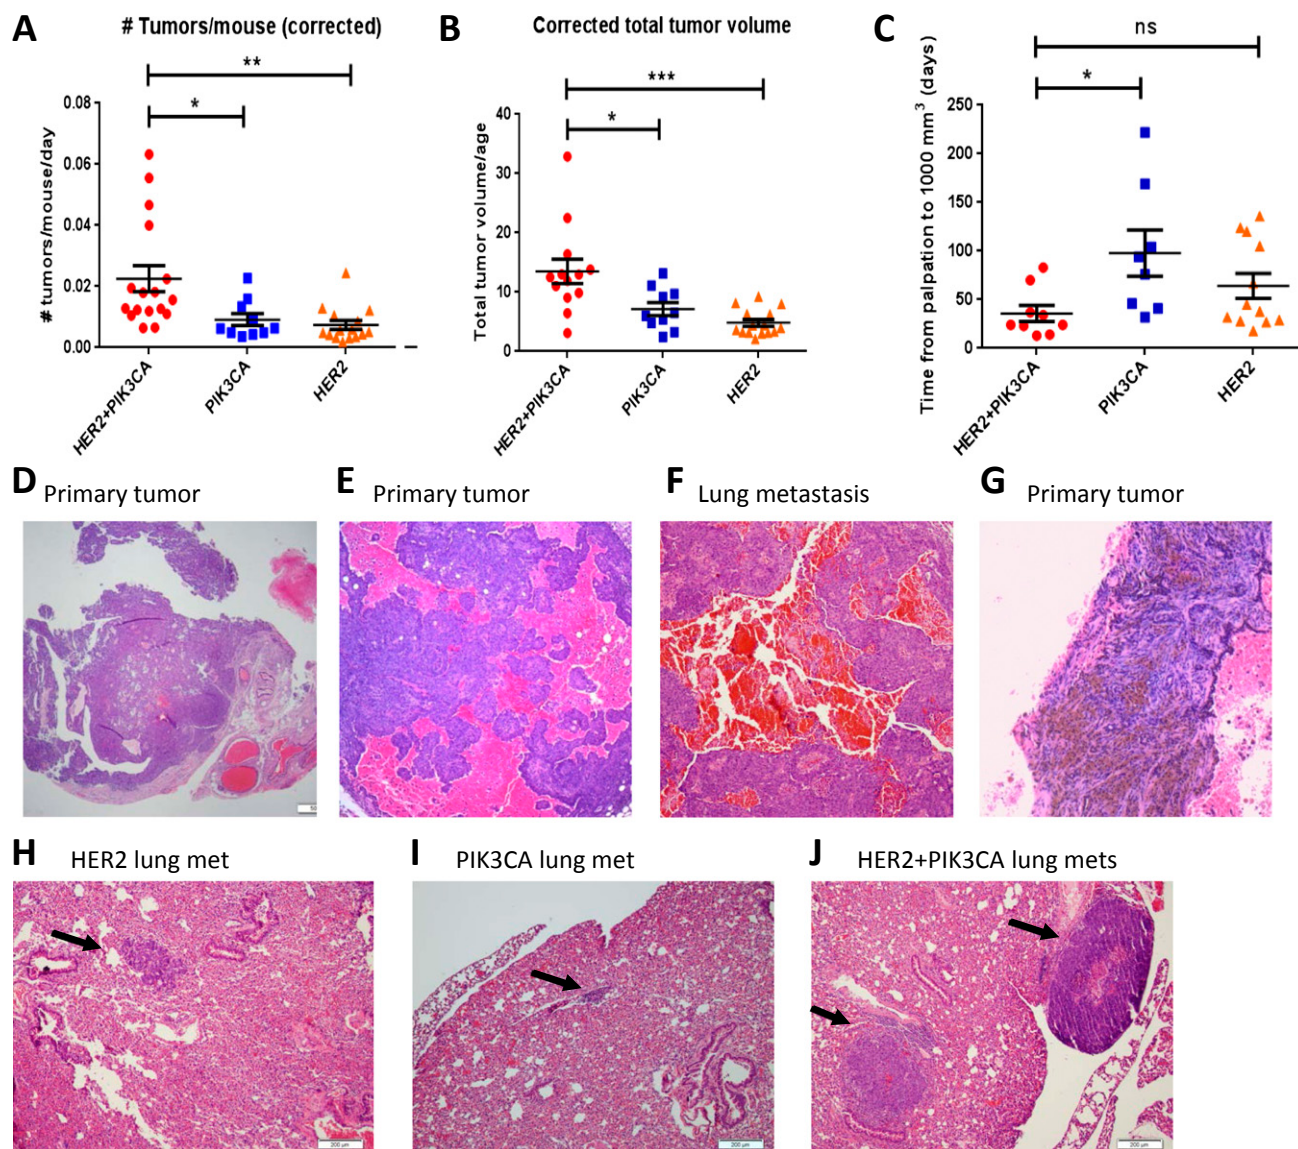

**Fig. S3.** *HER2*<sup>+</sup>*PIK3CA* mice develop multiple fast-growing, hemorrhagic mammary tumors. (A) Number of mammary tumors per mouse was confirmed at killing and divided by age at killing. \* $P < 0.05$ , \*\* $P < 0.01$ , Tukey's multiple comparison test. (B) Total tumor volume was measured with calipers at time of killing and divided by age at killing. \* $P < 0.05$ , \*\*\* $P < 0.001$ , Tukey's multiple comparison test. (C) The amount of time for a tumor to grow to 1,000 mm<sup>3</sup> was calculated from the time of palpation. Tumors were measured with calipers twice weekly. \* $P < 0.05$ , Tukey's multiple comparison test. (D–G) H&E images of *HER2*<sup>+</sup>*PIK3CA* primary tumors (D, E, and G) and lung metastasis (F) showing hemorrhagic areas or areas of high blood content. (D) Image showing large blood vessels adjacent to the tumor. (E) Image of a blood-filled tumor. (F) Image of a hemorrhagic lung metastasis. (G) Image of a hemorrhagic tumor showing hemosiderin-laden macrophages in the stroma. (H–J) H&E images of lung metastases from nude mice injected with cells from *HER2* (H), *PIK3CA* (I), or *HER2*<sup>+</sup>*PIK3CA* (J) tumors. (Magnification: D, 4×; E and F, 10×; G, 20×; H–J, 10×; scale bar, 200 μm.)

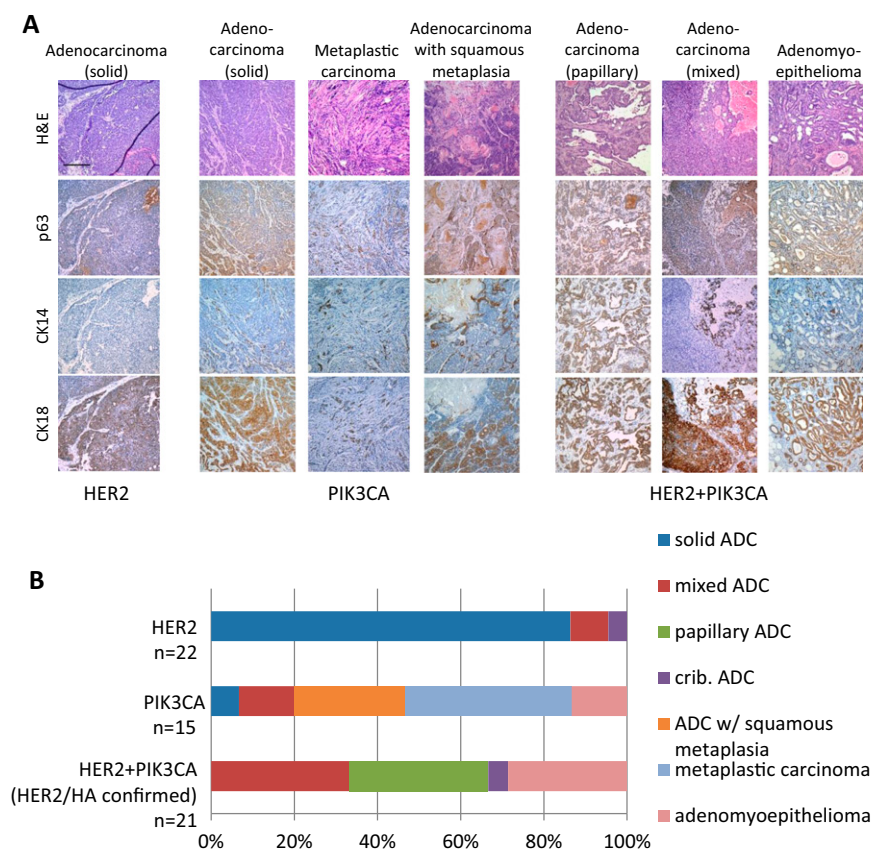

**Fig. S4.** *PIK3CA* and *HER2*<sup>+</sup>*PIK3CA* tumors are histologically heterogeneous and express luminal and basal markers. (A) Formalin-fixed, paraffin-embedded (FFPE) tumor sections from the indicated genotypes were stained with H&E or subjected to IHC with antibodies to cytokeratin 18 (luminal marker), cytokeratin 14 (myoepithelial/basal marker), or p63 (basal marker). (Scale bar, 200  $\mu$ m.) (B) Histological phenotypes were quantified by an expert breast pathologist. ADC, adenocarcinoma; cribriform. Only *HER2*.rtTA.*PIK3CA* + DOX tumors with confirmed expression of human HER2 and HA-PI3K were included in this analysis.

A

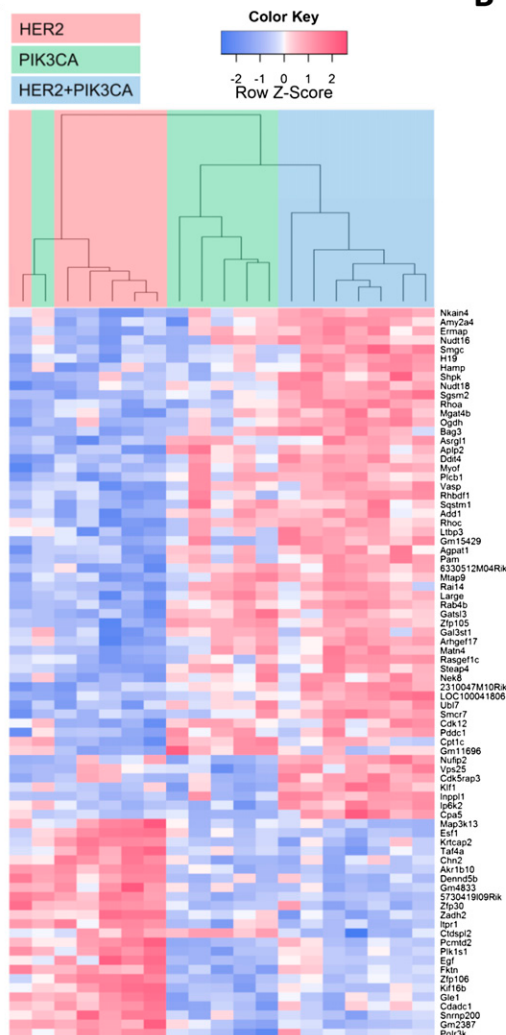

# B

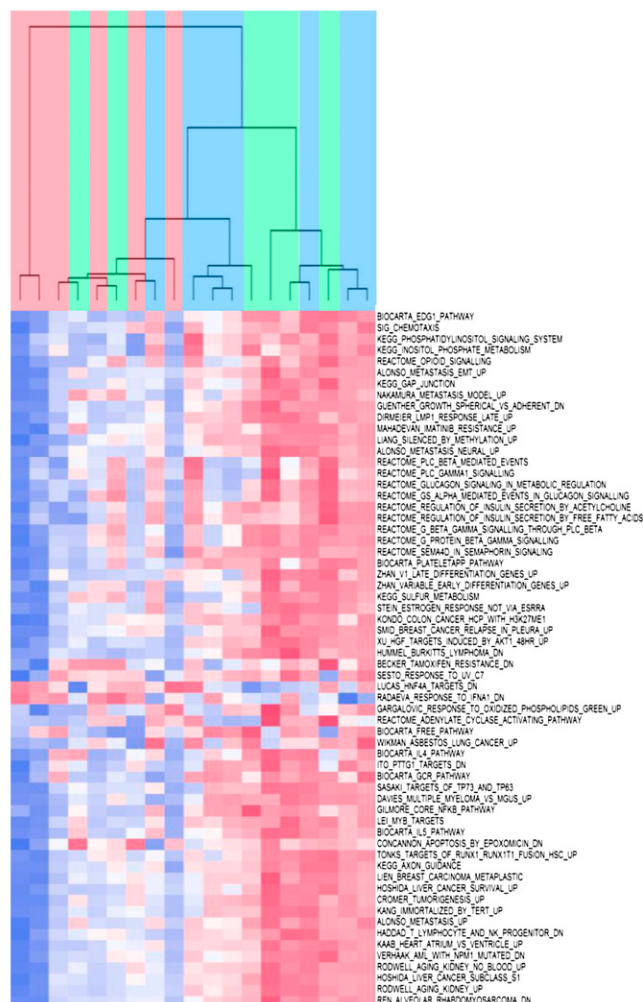

**Fig. S5.** Analysis of gene expression profiles for *HER2*, *PIK3CA*, and *HER2<sup>+</sup>PIK3CA* tumors. RNA isolated from mouse mammary tumors of the indicated genotypes was hybridized to Agilent 4 × 180 k mouse microarrays. (A) Hierarchical clustering of gene expression profiles. An FDR cutoff of 0.05 was used, resulting in a dataset of 81 significantly altered genes. (B) Gene set analysis (GSA) of the mouse tumor gene expression microarrays was performed in R using the multiclass algorithm and the maxmean option. Gene sets from the C2 curated Molecular Signatures Database were considered for analysis. Enriched gene sets were chosen at a FDR of 0.2. Clustering was performed in R. ANOVA *P* values are shown in Table S1.





**Table S1. Gene set analysis of *HER2*, *PIK3CA*, and *HER2+PIK3CA* tumors**

| Gene_set | Gene_set_name                                                | Score  | P value | FDR    |
|----------|--------------------------------------------------------------|--------|---------|--------|
| 886      | <b>GUENTHER_GROWTH_SPHERICAL_VS_ADHERENT_DN</b>              | 0.6382 | 0       | 0      |
| 1649     | ALONSO_METASTASIS_NEURAL_UP                                  | 1.1014 | 0       | 0      |
| 1841     | ZHAN_V1_LATE_DIFFERENTIATION_GENES_UP                        | 0.6816 | 0       | 0      |
| 2903     | REACTOME_G_PROTEIN_BETA_GAMMA_SIGNALING                      | 0.6231 | 0       | 0      |
| 253      | TONKS_TARGETS_OF_RUNX1_RUNX1T1_FUSION_HSC_UP                 | 0.3027 | 0.002   | 0.0239 |
| 1271     | KANG_IMMORTALIZED_BY_TERT_UP                                 | 0.4843 | 0.002   | 0.0239 |
| 2483     | <b>KEGG_PHOSPHATIDYLINOSITOL_SIGNALING_SYSTEM</b>            | 0.5144 | 0.002   | 0.0239 |
| 3028     | REACTOME_PLG_BETA_MEDIATED_EVENTS                            | 0.6778 | 0.002   | 0.0239 |
| 814      | <b>LIEN_BREAST_CARCINOMA_METAPLASTIC</b>                     | 0.9564 | 0.004   | 0.047  |
| 1251     | LEI_MYB_TARGETS                                              | 1.3402 | 0.004   | 0.047  |
| 1647     | <b>ALONSO_METASTASIS_EMT_UP</b>                              | 0.5934 | 0.004   | 0.047  |
| 2510     | KEGG_GAP_JUNCTION                                            | 0.4203 | 0.004   | 0.047  |
| 2673     | BIOCARTA_IL5_PATHWAY                                         | 1.7121 | 0.004   | 0.047  |
| 207      | GARGALOVIC_RESPONSE_TO_OXIDIZED_PHOSPHOLIPIDS_GREEN_UP       | 0.5655 | 0.006   | 0.0687 |
| 517      | MAHADEVAN_IMATINIB_RESISTANCE_UP                             | 0.8767 | 0.006   | 0.0687 |
| 1650     | <b>ALONSO_METASTASIS_UP</b>                                  | 0.1852 | 0.006   | 0.0687 |
| 1964     | STEIN_ESTROGEN_RESPONSE_NOT_VIA_ESRRA                        | 0.7535 | 0.006   | 0.0687 |
| 2118     | RODWELL_AGING_KIDNEY_NO_BLOOD_UP                             | 0.5759 | 0.006   | 0.0687 |
| 2432     | <b>KEGG_INOSITOL_PHOSPHATE_METABOLISM</b>                    | 0.5163 | 0.006   | 0.0687 |
| 2999     | REACTOME_OPIOID_SIGNALING                                    | 0.2793 | 0.006   | 0.0687 |
| 730      | DIRMEIER_LMP1_RESPONSE_LATE_UP                               | 0.4342 | 0.008   | 0.09   |
| 1399     | KONDO_COLON_CANCER_HCP_WITH_H3K27ME1                         | 0.5214 | 0.008   | 0.09   |
| 1529     | SMID_BREAST_CANCER_RELAPSE_IN_PLEURA_UP                      | 1.2029 | 0.008   | 0.09   |
| 1593     | NAKAMURA_METASTASIS_MODEL_UP                                 | 0.4368 | 0.008   | 0.09   |
| 3078     | REACTOME_SEMA4D_IN_SEMAPHORIN_SIGNALING                      | 0.5211 | 0.008   | 0.09   |
| 586      | GILMORE_CORE_NFKB_PATHWAY                                    | 1.0975 | 0.01    | 0.1105 |
| 1304     | VERHAAK_AML_WITH_NPM1_MUTATED_DN                             | 0.4133 | 0.01    | 0.1105 |
| 2124     | KAAB_HEART_ATRIUM_VS_VENTRICLE_UP                            | 0.3218 | 0.01    | 0.1105 |
| 2338     | SESTO_RESPONSE_TO_UV_C7                                      | 0.345  | 0.01    | 0.1105 |
| 2716     | BIOCARTA_EDG1_PATHWAY                                        | 0.5385 | 0.01    | 0.1105 |
| 440      | CONCANNON_APOPTOSIS_BY_EPOXOMICIN_DN                         | 0.3073 | 0.012   | 0.1294 |
| 1652     | CROMER_TUMORIGENESIS_UP                                      | 0.8301 | 0.012   | 0.1294 |
| 2187     | LIANG_SILENCED_BY_METHYLATION_UP                             | 0.827  | 0.012   | 0.1294 |
| 2654     | BIOCARTA_FREE_PATHWAY                                        | 0.7111 | 0.012   | 0.1294 |
| 2804     | REACTOME_ADENYLATE_CYCLASE_ACTIVATING_PATHWAY                | 1.138  | 0.012   | 0.1294 |
| 2915     | REACTOME_GLUCAGON_SIGNALING_IN_METABOLIC_REGULATION          | 0.5007 | 0.012   | 0.1294 |
| 3239     | SIG_CHEMOTAXIS                                               | 0.2939 | 0.012   | 0.1294 |
| 749      | SASAKI_TARGETS_OF_TP73_AND_TP63                              | 1.2006 | 0.014   | 0.149  |
| 1544     | ITO_PTTG1_TARGETS_DN                                         | 0.6912 | 0.014   | 0.149  |
| 3029     | REACTOME_PLG_GAMMA1_SIGNALING                                | 0.4466 | 0.014   | 0.149  |
| 3188     | REACTOME_G_BETA_GAMMA_SIGNALING_THROUGH_PLG_BETA             | 0.5832 | 0.014   | 0.149  |
| 168      | WIKMAN_ASBESTOS_LUNG_CANCER_UP                               | 0.576  | 0.016   | 0.1658 |
| 1204     | RADAEVA_RESPONSE_TO_IFNA1_DN                                 | 1.0987 | 0.016   | 0.1658 |
| 1674     | DAVIES_MULTIPLE_MYELOMA_VS_MGUS_UP                           | 0.9383 | 0.016   | 0.1658 |
| 1839     | ZHAN_VARIABLE_EARLY_DIFFERENTIATION_GENES_UP                 | 0.6857 | 0.016   | 0.1658 |
| 1981     | HOSHIDA_LIVER_CANCER_SUBCLASS_S1                             | 0.4358 | 0.016   | 0.1658 |
| 2457     | KEGG_SULFUR_METABOLISM                                       | 0.9277 | 0.016   | 0.1658 |
| 2719     | BIOCARTA_PLATELETAPP_PATHWAY                                 | 0.9778 | 0.016   | 0.1658 |
| 2928     | REACTOME_GS_ALPHA_MEDIATED_EVENTS_IN_GLUCAGON_SIGNALING      | 0.584  | 0.016   | 0.1658 |
| 288      | HUMMEL_BURKITT'S_LYMPHOMA_DN                                 | 0.7217 | 0.018   | 0.1824 |
| 690      | XU_HGF_TARGETS_INDUCED_BY_AKT1_48HR_UP                       | 0.8726 | 0.018   | 0.1824 |
| 1295     | HADDAD_T_LYMPHOCYTE_AND_NK_PROGENITOR_DN                     | 0.585  | 0.018   | 0.1824 |
| 1324     | REN_ALVEOLAR_RHABDOMYOSARCOMA_DN                             | 0.3248 | 0.018   | 0.1824 |
| 1903     | HOSHIDA_LIVER_CANCER_SURVIVAL_UP                             | 0.5133 | 0.018   | 0.1824 |
| 2503     | KEGG_AXON_GUIDANCE                                           | 0.2308 | 0.018   | 0.1824 |
| 3049     | REACTOME_REGULATION_OF_INSULIN_SECRETION_BY_ACETYLCHOLINE    | 0.4752 | 0.018   | 0.1824 |
| 505      | LUCAS_HNF4A_TARGETS_DN                                       | 1.1966 | 0.02    | 0.1989 |
| 1205     | BECKER_TAMOXIFEN_RESISTANCE_DN                               | 0.4479 | 0.02    | 0.1989 |
| 2119     | RODWELL_AGING_KIDNEY_UP                                      | 0.3817 | 0.02    | 0.1989 |
| 2623     | BIOCARTA_GCR_PATHWAY                                         | 0.5628 | 0.02    | 0.1989 |
| 2672     | BIOCARTA_IL4_PATHWAY                                         | 0.8072 | 0.02    | 0.1989 |
| 3168     | REACTOME_REGULATION_OF_INSULIN_SECRETION_BY_FREE_FATTY_ACIDS | 0.484  | 0.02    | 0.1989 |

GSA was performed in R using the multiclass algorithm and the maxmean option. Gene sets from the C2 curated Molecular Signatures Database were considered for analysis. Enriched gene sets were chosen at a FDR of 0.2. Gene sets associated with EMT, metastasis, metaplastic breast carcinoma, or PI3K signaling are highlighted in bold.



Table S2. Cont.

| Gene name     | HER2 <sup>+</sup> PIK3CA vs.<br>HER2_diff | PIK3CA vs.<br>HER2_diff | PIK3CA vs. HER2 <sup>+</sup><br>PIK3CA_diff | HER2 <sup>+</sup> PIK3CA vs.<br>HER2_p.val | PIK3CA vs.<br>HER2_p.val | PIK3CA vs. HER2 <sup>+</sup><br>PIK3CA_p.val |
|---------------|-------------------------------------------|-------------------------|---------------------------------------------|--------------------------------------------|--------------------------|----------------------------------------------|
| Tssc4         | 0.602619                                  | 0.06                    | -0.54262                                    | 0.011068                                   | 0.945334                 | 0.021744                                     |
| Bin3          | 0.709048                                  | 0.156667                | -0.55238                                    | 0.005191                                   | 0.715424                 | 0.02758                                      |
| Nkain4        | 1.221905                                  | 0.71                    | -0.5119                                     | 1.06E-05                                   | 0.003817                 | 0.02774                                      |
| Lrp10         | 0.500238                                  | -0.02667                | -0.5269                                     | 0.002381                                   | 0.976129                 | 0.001521                                     |
| 1810030J14Rik | 1.610714                                  | 0.461667                | -1.14905                                    | 0.001633                                   | 0.483168                 | 0.020161                                     |
| 9130011J15Rik | 0.37                                      | 0.086667                | -0.28333                                    | 0.006983                                   | 0.706484                 | 0.037766                                     |
| Rnf186        | 0.760952                                  | 0.068333                | -0.69262                                    | 0.012687                                   | 0.956996                 | 0.023007                                     |
| Slc39a8       | 1.695952                                  | 0.128333                | -1.56762                                    | 0.007958                                   | 0.964911                 | 0.013695                                     |
| Dynll2        | 0.761429                                  | -0.07833                | -0.83976                                    | 0.008997                                   | 0.938314                 | 0.004336                                     |
| 1110006G14Rik | 0.573571                                  | 0.15                    | -0.42357                                    | 0.001944                                   | 0.555841                 | 0.018425                                     |
| Nufip2        | 0.290952                                  | -0.185                  | -0.47595                                    | 0.004828                                   | 0.086382                 | 4.24E-05                                     |
| Aspscr1       | 0.459286                                  | 0.065                   | -0.39429                                    | 0.009806                                   | 0.889447                 | 0.026008                                     |
| Ankle2        | 0.439286                                  | -0.19333                | -0.63262                                    | 0.039099                                   | 0.49974                  | 0.003455                                     |
| 2310047M10Rik | 0.868095                                  | 0.41                    | -0.4581                                     | 0.000165                                   | 0.063119                 | 0.029486                                     |
| Thoc3         | 0.676905                                  | 0.073333                | -0.60357                                    | 0.017279                                   | 0.943536                 | 0.033974                                     |
| Rasgef1c      | 2.422857                                  | 1.06                    | -1.36286                                    | 5.87E-05                                   | 0.057899                 | 0.010931                                     |
| Shpk          | 0.809762                                  | 0.06                    | -0.74976                                    | 0.000815                                   | 0.94246                  | 0.001638                                     |
| Cpa5          | 0.57119                                   | -0.17167                | -0.74286                                    | 0.001273                                   | 0.431892                 | 9.25E-05                                     |
| Ddit4         | 1.358571                                  | 0.658333                | -0.70024                                    | 0.000345                                   | 0.077597                 | 0.048938                                     |
| Wdr54         | -0.51643                                  | -0.01667                | 0.499762                                    | 0.016905                                   | 0.994802                 | 0.020734                                     |
| Gpsm2         | -0.5869                                   | 0.076667                | 0.663571                                    | 0.021029                                   | 0.923851                 | 0.009411                                     |
| Ip6k2         | 0.293571                                  | -0.03                   | -0.32357                                    | 0.001078                                   | 0.899628                 | 0.000428                                     |
| Dcst1         | 0.480714                                  | -0.05333                | -0.53405                                    | 0.010755                                   | 0.932093                 | 0.004999                                     |
| Mvp           | 0.82881                                   | 0.165                   | -0.66381                                    | 0.004048                                   | 0.747764                 | 0.019321                                     |
| Celf3         | 0.802857                                  | 0.27                    | -0.53286                                    | 0.002476                                   | 0.407214                 | 0.040079                                     |
| Wsb1          | 0.713333                                  | 0.208333                | -0.505                                      | 0.000722                                   | 0.409268                 | 0.011889                                     |
| Cdk5rap3      | 0.477381                                  | -0.18833                | -0.66571                                    | 0.006195                                   | 0.376851                 | 0.000335                                     |
| Hamp          | 1.175952                                  | 0.513333                | -0.66262                                    | 0.000133                                   | 0.081902                 | 0.017648                                     |
| Rnf123        | 0.42881                                   | 0.006667                | -0.42214                                    | 0.002527                                   | 0.997973                 | 0.002878                                     |
| Tprn          | 0.81119                                   | 0.155                   | -0.65619                                    | 0.002216                                   | 0.733615                 | 0.011229                                     |
| Cog8          | 0.479286                                  | -0.00333                | -0.48262                                    | 0.006893                                   | 0.999685                 | 0.006549                                     |
| Sgsm2         | 0.766905                                  | 0.225                   | -0.5419                                     | 5.47E-07                                   | 0.063757                 | 4.10E-05                                     |

Microarray data were analyzed by ANOVA using a three-class comparison and an FDR cutoff of 0.1. Genes that are differentially expressed ( $P < 0.05$ , Tukeys multiple comparison test) between both *HER2*<sup>+</sup>*PIK3CA* vs. *HER2* tumors and *HER2*<sup>+</sup>*PIK3CA* vs. *PIK3CA* tumors are shown.
